### Erratum

#### **Vasopressin *versus* Norepinephrine in Patients with Vasoplegic Shock after Cardiac Surgery: The VANCS Randomized Controlled Trial: Erratum**

In the article beginning on page 85 of the January 2017 issue, the nomenclature, “ $2.2 \text{ l} \cdot \text{min}^{-2} \cdot \text{m}^{-2}$ ” is incorrect due to a publisher error. The correct nomenclature is “ $2.2 \text{ l} \cdot \text{min}^{-1} \cdot \text{m}^{-2}$ .” This error has been corrected in the online version of the article.

#### **Reference**

Hajjar LA, Vincent JL, Barbosa Gomes Galas FR, Rhodes A, Landoni G, Osawa EA, Melo RR, Sundin MR, Grande SM, Gaiotto FA, Pomerantzeff PM, Dallan LO, Franco RA, Nakamura RE, Lisboa LA, de Almeida JP, Gerent AM, Souza DH, Gaiane MA, Fukushima JT, Park CL, Zambolim C, Rocha Ferreira GS, Strabelli TM, Fernandes FL, Camara L, Zeferino S, Santos VG, Piccioni MA, Jatene FB, Costa Auler JO Jr, Filho RK: Vasopressin *versus* norepinephrine in patients with vasoplegic shock after cardiac surgery: The VANCS randomized controlled trial. *ANESTHESIOLOGY* 2017; 126:85–93.

### Erratum

#### **Vasopressin, Norepinephrine, and Vasodilatory Shock after Cardiac Surgery: Another “VASST” Difference? Erratum**

In the article beginning on page 9 of the January 2017 issue, the nomenclature, “ $2.2 \text{ l} \cdot \text{min} \cdot \text{m}^{-2}$ ” is incorrect due to a publisher error. The correct nomenclature is “ $2.2 \text{ l} \cdot \text{min}^{-1} \cdot \text{m}^{-2}$ .” This error has been corrected in the online version of the article.

#### **Reference**

Russell JA: Vasopressin, norepinephrine, and vasodilatory shock after cardiac surgery: Another “VASST” difference? *ANESTHESIOLOGY* 2017; 126:9–11.

### Erratum

#### **Current Status of Neuromuscular Reversal and Monitoring: Challenges and Opportunities: Erratum**

In the article beginning on page 173 of the January 2017 issue, the sentence, “It is less effective as a reversal agent, as the bonds it forms with NMBA molecules are ionic and much weaker than the covalent bonds of neostigmine and NMBA,” is incorrect. The correct sentence is, “It is less effective as a reversal agent, as the bonds it forms with acetylcholinesterases are ionic and much weaker than the covalent bonds of neostigmine and acetylcholinesterases.” This error has been corrected in the online version of the article.

#### **Reference**

Brull SJ, Kopman AF: Current status of neuromuscular reversal and monitoring: Challenges and opportunities. *ANESTHESIOLOGY* 2017; 126:173–90
